# Supplementary material for: Investigation of commercial aluminum alloys as anode materials for alkaline aluminum–air batteries
Source: Royal Society of Chemistry journal article supplement (doi:10.1039/d2se01341j), 2022-11-25
Supplement: d2se01341j1.pdf [file d2se01341j1.pdf]

## Supporting Information

### **Investigation of the Commercial Aluminum Alloys as Anode Materials for Alkaline Aluminum-air Batteries**

Tao Wang<sup>a</sup>, Yuan Zhu<sup>a</sup>, Yifan Li<sup>a</sup>, Kai Yang<sup>b</sup>, Wenyi Lu<sup>c</sup>, Ke Peng<sup>a,\*</sup>, Zhongliang Tian<sup>a,\*</sup>

*<sup>a</sup>School of Metallurgy and Environment, Central South University, Changsha 410083, China*

*<sup>b</sup>School of Metallurgical Engineering, Xi'an University of Architecture and Technology, Xi'an, 710055, Shaanxi, China*

*<sup>c</sup>Binzhou Institute of Technology, Weiqiao-UCAS Science and Technology Park, Binzhou 256606, Shandong Province, China.*

Corresponding author:

Ke Peng: [pengke\\_msg@csu.edu.cn](mailto:pengke_msg@csu.edu.cn)

Zhongliang Tian: [tianzhongliang@csu.edu.cn](mailto:tianzhongliang@csu.edu.cn)

**Figure S1.** The illustration of the hydrogen collection device.

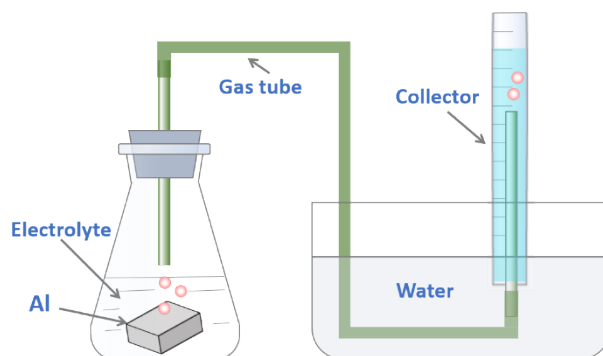

**Figure S2.** (a) The illustration of the flow-based Al-air battery, and (b) the corresponding digital image.

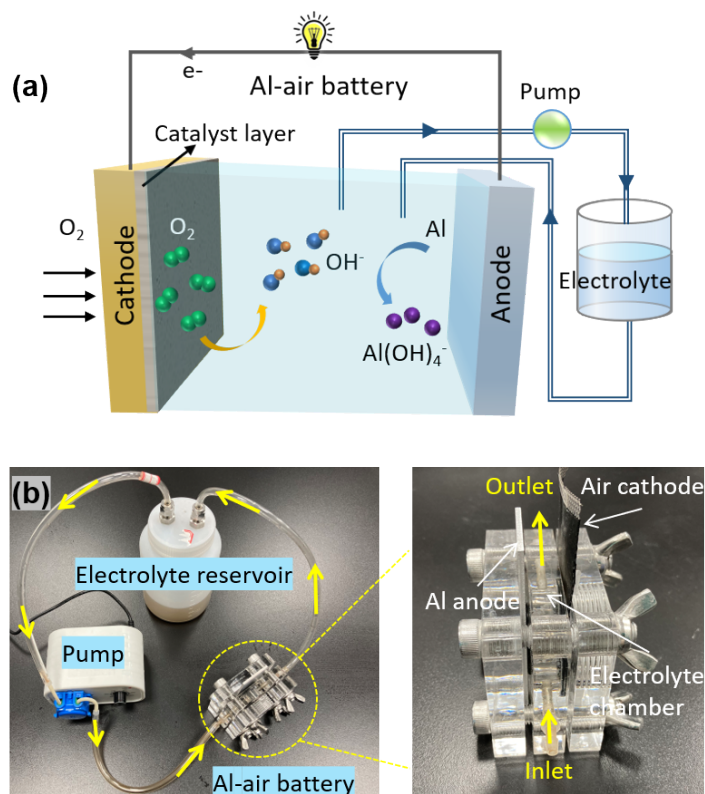

**Figure S3.** The self-corrosion measured by the weight loss method.

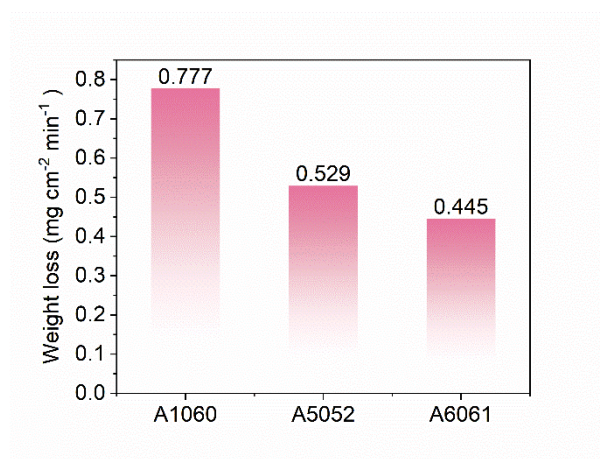

**Figure S4.** (a, b) The digital images of the Al alloys before and after testing in the alkaline solution. Morphology and composition characterization of the product films on the alloy surface after testing: (c-e) A1060, (f-h) A5052, (i-k) A6061.

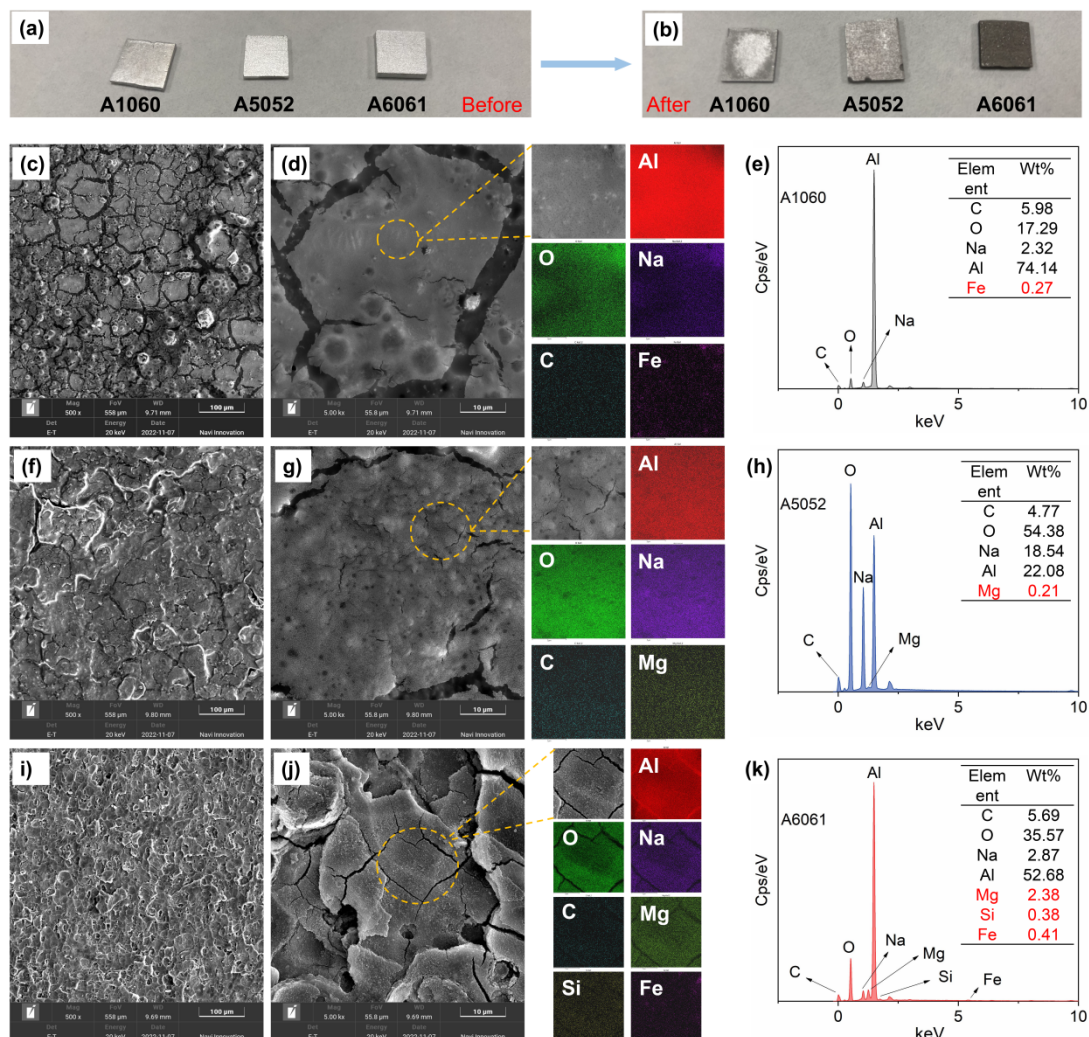

It is obvious that the reaction products on the Al alloy surface are different. The products on 6061 Al alloy (A6061) are denser and more uniform (**Fig. S4 c, f, and i**). According to the element mapping results, the products are mainly composed of  $\text{Al}(\text{OH})_3$ ,  $\text{Na}_2\text{CO}_3$ , and  $\text{NaOH}$  residue.  $\text{Na}_2\text{CO}_3$  is generated from the reaction between  $\text{NaOH}$  and  $\text{CO}_2$  (from both the aqueous electrolyte (dissolved) and the air (during sample preparation)). However, the impurity elements and the contents are different. Because of the higher purity of A1060, Fe (0.24 wt.%) is the only impurity element on the A1060 surface (**Fig. S4 e**). Mg (0.21 wt.%) is the main impurity element on the

A5052 and A6061 surfaces (**Fig. S4 h and k**), as both are typical Mg-based alloys. Differently, there are additional Si (0.38 wt.%) and Fe (0.41 wt.%) elements on the A6061 surface. In alkaline solutions, Mg, Si, and Fe element would react to form precipitates to accumulate on the Al surface. Hence, the compositions of the product films are different.

**Figure S5.** The partial magnified discharge curve at  $10 \text{ mA cm}^{-2}$ .

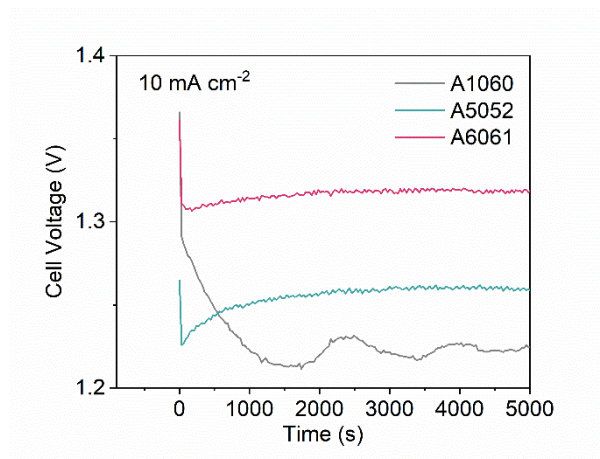

**Figure S6.** The formation mechanism of the deep corrosion hole.

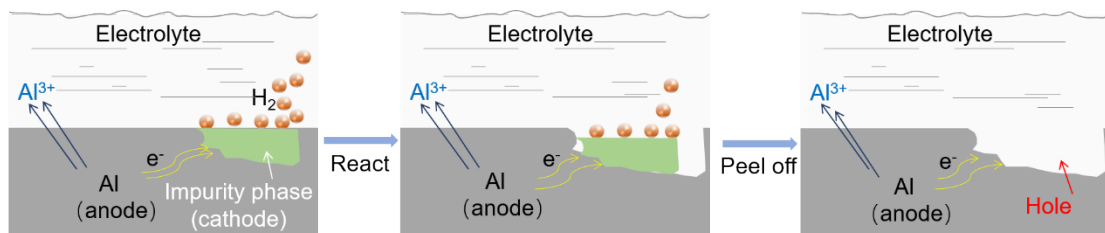

**Table S1.** The OCP, corrosion potential ( $E_{\text{corr}}$ ), and corrosion current density ( $I_{\text{corr}}$ ) of the alloy anodes.

| Alloys | OCP (V) | $E_{\text{corr}}$ (V) | $I_{\text{corr}}$ (mA cm <sup>-2</sup> ) |
|--------|---------|-----------------------|------------------------------------------|
| A1060  | -1.261  | -1.229                | 21.1                                     |
| A5052  | -1.292  | -1.281                | 22.5                                     |
| A6061  | -1.417  | -1.414                | 22.0                                     |

**Table S2.** The fitting values of the charge transfer resistance of the Al alloy anodes immersed in 4 M NaOH electrolyte.

| Alloys | $R_{\text{ct},1}$<br>( $\Omega \cdot \text{cm}^{-2}$ ) | $R_{\text{ct},2}$<br>( $\Omega \cdot \text{cm}^{-2}$ ) |
|--------|--------------------------------------------------------|--------------------------------------------------------|
| A1060  | 0.41                                                   | 0.08                                                   |
| A5052  | 0.23                                                   | 0.09                                                   |
| A6061  | 0.53                                                   | 0.08                                                   |

**Table S3.** The battery voltages, power densities, specific capacities, and energy densities of the A1060 anode at different current densities.

| Current density<br>(mA cm <sup>-2</sup> ) | Voltage<br>(V) | Power density<br>(mW cm <sup>-2</sup> ) | Specific capacity<br>(mAh g <sup>-1</sup> ) | Energy density<br>(Wh kg <sup>-1</sup> ) |
|-------------------------------------------|----------------|-----------------------------------------|---------------------------------------------|------------------------------------------|
| 5                                         | 1.3058         | 6.53                                    | 198.3                                       | 259.69                                   |
| 10                                        | 1.2236         | 12.27                                   | 348.93                                      | 429.14                                   |
| 20                                        | 1.1347         | 22.80                                   | 647.66                                      | 738.09                                   |
| 30                                        | 1.0476         | 31.80                                   | 990.93                                      | 1050.94                                  |
| 40                                        | 0.9704         | 41.24                                   | 1347.15                                     | 1389.48                                  |
| 50                                        | 0.8836         | 48.03                                   | 1658.17                                     | 1592.73                                  |
| 60                                        | 0.8225         | 49.32                                   | 1880.68                                     | 1547.25                                  |
| 80                                        | 0.6993         | 55.90                                   | 2419.55                                     | 1691.79                                  |

**Table S4.** The battery voltages, power densities, specific capacities, and energy densities of the A5052 anode at different current densities.

| Current density<br>(mA cm <sup>-2</sup> ) | Voltage<br>(V) | Power density<br>(mW cm <sup>-2</sup> ) | Specific capacity<br>(mAh g <sup>-1</sup> ) | Energy density<br>(Wh kg <sup>-1</sup> ) |
|-------------------------------------------|----------------|-----------------------------------------|---------------------------------------------|------------------------------------------|
| 5                                         | 1.2968         | 6.46                                    | 155.89                                      | 202.11                                   |
| 10                                        | 1.2568         | 12.55                                   | 345.67                                      | 434.43                                   |
| 20                                        | 1.1717         | 23.42                                   | 605.67                                      | 709.57                                   |
| 30                                        | 1.0971         | 32.89                                   | 925.48                                      | 1015.34                                  |
| 40                                        | 1.0391         | 41.55                                   | 1173.41                                     | 1219.21                                  |
| 50                                        | 0.9906         | 49.49                                   | 1320.08                                     | 1307.64                                  |
| 60                                        | 0.9091         | 54.38                                   | 1638.96                                     | 1489.79                                  |
| 80                                        | 0.7456         | 59.59                                   | 2145.96                                     | 1599.04                                  |

**Table S5.** The battery voltages, power densities, specific capacities, and energy densities of the A6061 anode at different current densities.

| Current density<br>(mA cm <sup>-2</sup> ) | Voltage<br>(V) | Power density<br>(mW cm <sup>-2</sup> ) | Specific capacity<br>(mAh g <sup>-1</sup> ) | Energy density<br>(Wh kg <sup>-1</sup> ) |
|-------------------------------------------|----------------|-----------------------------------------|---------------------------------------------|------------------------------------------|
| 5                                         | 1.3538         | 6.75                                    | 213.06                                      | 288.51                                   |
| 10                                        | 1.3139         | 13.15                                   | 402.98                                      | 529.37                                   |
| 20                                        | 1.2574         | 25.18                                   | 651.91                                      | 819.78                                   |
| 30                                        | 1.1908         | 35.80                                   | 930.72                                      | 1108.24                                  |
| 40                                        | 1.1378         | 45.50                                   | 1227.09                                     | 1396.13                                  |
| 50                                        | 1.0658         | 53.22                                   | 1491.54                                     | 1588.90                                  |
| 60                                        | 0.9658         | 57.91                                   | 2090.80                                     | 2020.00                                  |
| 80                                        | 0.7963         | 63.69                                   | 2660.69                                     | 2119.09                                  |

**Table S6.** The main elements and contents of the alloys (wt.%).

| Alloys | Cr     | Cu     | Fe   | Mg     | Mn     | Si    | Zn    | Al  |
|--------|--------|--------|------|--------|--------|-------|-------|-----|
| A1060  | 0.0010 | 0.0046 | 0.20 | 0.0027 | 0.0094 | 0.060 | 0.012 | Bal |
| A5052  | 0.17   | 0.0069 | 0.19 | 2.18   | 0.061  | 0.061 | 0.011 | Bal |
| A6061  | 0.16   | 0.19   | 0.13 | 0.90   | 0.0053 | 0.34  | 0.008 | Bal |
